# Supplementary material for: Associations between Unconventional Natural Gas Development and Nasal and Sinus, Migraine Headache, and Fatigue Symptoms in Pennsylvania
Source: PubMed Central journal article supplement (PMC5289909; doi:10.1289/ehp281), 2016-08-25
Supplement: EHP281.s001.acco.pdf [file EHP281.s001.acco.pdf]

**Note to readers with disabilities:** *EHP* strives to ensure that all journal content is accessible to all readers. However, some figures and Supplemental Material published in *EHP* articles may not conform to [508 standards](#) due to the complexity of the information being presented. If you need assistance accessing journal content, please contact [ehp508@niehs.nih.gov](mailto:ehp508@niehs.nih.gov). Our staff will work with you to assess and meet your accessibility needs within 3 working days.

## **Supplemental Material**

# **Associations between Unconventional Natural Gas Development and Nasal and Sinus, Migraine Headache, and Fatigue Symptoms in Pennsylvania**

Aaron W. Tustin, Annemarie G. Hirsch, Sara G. Rasmussen, Joan A. Casey, Karen Bandeen-Roche, and Brian S. Schwartz

### **Table of Contents**

#### **Models of past disease and moderate symptoms**

**Table S1.** Stratified survey design, response frequencies, and sampling weights

**Table S2.** Associations of UNGD with current CRS, stratified by date of symptom onset

**Table S3.** Sensitivity analysis of the effects of sampling weights on associations between UNGD and symptoms

**Table S4.** Sensitivity analysis of different time averaging periods for UNGD activity

**Table S5.** Associations of UNGD with past CRS and moderate levels of fatigue

**Table S6.** Selected characteristics of individuals in the fourth quartile of UNGD, compared to those in other quartiles

**Table S7.** Effect of place type (township, borough, or census tract in city) on associations of UNGD with symptoms

#### **Additional File**

**Supplemental Code and Data ZIP File**

**Population Study of Nasal and Sinus Symptoms**

## **Models of Past Disease and Moderate Symptoms**

In our primary analysis, 2889 study participants were classified as neither cases nor controls. These individuals did not meet case criteria and were excluded from the reference group because of past CRS, intermediate likelihood of migraine headache, and/or moderate fatigue symptoms.

In a sensitivity analysis, we created two logistic regression models in which we re-classified some of these excluded individuals as cases. The purpose of this analysis was to determine whether UNGD was associated with less severe or past symptoms. In the first model (“past CRS”), the case group comprised all study participants who met criteria for past CRS (as defined in the main text) but who did not meet criteria for migraine headache or higher levels of fatigue ( $n = 1238$ ). In the second model (“moderate fatigue”), cases were all individuals with moderate levels of fatigue (defined as the third quartile of fatigue;  $19 \leq \text{fatigue score} < 28$ ) but who did not meet criteria for current CRS or migraine headache ( $n = 1132$ ). Both models compared cases to the reference group, described in the main text, of individuals with no past or current CRS, no migraine headache symptoms, and lower levels of fatigue ( $n = 1380$ ). Both models were adjusted for sex, race/ethnicity (non-Hispanic white vs. other), age (linear and quadratic terms), receipt of Medical Assistance (never vs. ever), and smoking status (never vs. former and current). In addition, the past CRS model was adjusted for centered body mass index.

**Table S1.** Stratified survey design, response frequencies, and sampling weights.

| <b>Race/ethnicity</b>              | <b>Lower likelihood of CRS</b> | <b>Intermediate likelihood of CRS</b> | <b>Higher likelihood of CRS</b> |
|------------------------------------|--------------------------------|---------------------------------------|---------------------------------|
| White, non-Hispanic                |                                |                                       |                                 |
| Identified using EHR, n            | 131,366                        | 47,892                                | 13,132                          |
| Survey recipients, n               | 2,775                          | 4,224                                 | 12,209                          |
| Survey respondents, n <sup>a</sup> | 871                            | 1,481                                 | 4,691                           |
| Sampling weight <sup>b</sup>       | 150.82                         | 32.34                                 | 2.80                            |
| Other                              |                                |                                       |                                 |
| Identified using EHR, n            | 5,991                          | 2,026                                 | 362                             |
| Survey recipients, n               | 2,283                          | 1,869                                 | 340                             |
| Survey respondents, n <sup>a</sup> | 322                            | 350                                   | 70                              |
| Sampling weight <sup>b</sup>       | 18.61                          | 5.79                                  | 5.17                            |

Abbreviations: EHR, electronic health record; CRS, chronic rhinosinusitis.

Based on EHR data, we stratified the source population by race/ethnicity and prior probability of having CRS. We then oversampled racial/ethnic minorities and individuals more likely to have CRS.

<sup>a</sup> Excludes respondents with residential addresses outside Pennsylvania (n = 62).

<sup>b</sup> Sampling weights were calculated by dividing the total number of individuals identified in the stratum by the number of survey respondents.

**Table S2.** Associations of UNGD with current CRS, stratified by date of symptom onset.

| <b>Onset date</b>                   | <b>UNGD quartile</b> | <b>Adjusted odds ratios (95% confidence intervals)</b> |
|-------------------------------------|----------------------|--------------------------------------------------------|
| Before January 1, 2006<br>(n = 519) | 1                    | 1.00 (reference)                                       |
|                                     | 2                    | 1.13 (0.72, 1.76)                                      |
|                                     | 3                    | 0.77 (0.50, 1.21)                                      |
|                                     | 4                    | 1.12 (0.71, 1.76)                                      |
| After January 1, 2006<br>(n = 89)   | 1                    | 1.00 (reference)                                       |
|                                     | 2                    | 3.27 (1.21, 8.82)                                      |
|                                     | 3                    | 1.62 (0.56, 4.64)                                      |
|                                     | 4                    | 3.26 (1.14, 9.36)                                      |

Abbreviations: UNGD, unconventional natural gas development; CRS, chronic rhinosinusitis.

Models compared individuals with current CRS (and no other primary outcome) to a reference group with no current or past CRS, no migraine headache symptoms, and lower levels of fatigue.

Models used sampling weights to account for the stratified survey design and response rates. The highest weight was truncated to the value of the second-highest weight. Models included these covariates: sex, race/ethnicity (white non-Hispanic vs. other), centered age (years), square of centered age, Medical Assistance (never vs. ever), smoking status (never vs. current and former), and centered body mass index. Individuals with unknown body mass index were excluded. Participants with current CRS were excluded from this analysis if their questionnaire responses did not provide enough information for us to determine whether their date of CRS onset occurred before or after January 1, 2006. UNGD activity was averaged over the 90 days prior to the survey.

**Table S3.** Sensitivity analysis of the effects of sampling weights on associations between UNGD and symptoms.

| Sampling weight method | UNGD quartile | Current CRS only (n = 736) <sup>a</sup>         | Migraine headache only (n = 580) | Higher levels of fatigue only (n = 666) | CRS and migraine (n = 266) <sup>a</sup> | CRS and fatigue <sup>a</sup> (n = 347) <sup>a</sup> | Migraine and fatigue (n = 420) | All three outcomes (n = 496) <sup>a</sup> |
|------------------------|---------------|-------------------------------------------------|----------------------------------|-----------------------------------------|-----------------------------------------|-----------------------------------------------------|--------------------------------|-------------------------------------------|
|                        |               | Adjusted odds ratios (95% confidence intervals) |                                  |                                         |                                         |                                                     |                                |                                           |
| Full weights           | 1             | 1.00 (reference)                                | 1.00 (reference)                 | 1.00 (reference)                        | 1.00 (reference)                        | 1.00 (reference)                                    | 1.00 (reference)               | 1.00 (reference)                          |
|                        | 2             | 1.11 (0.66, 1.88)                               | 1.12 (0.64, 1.97)                | 1.62 (0.96, 2.72)                       | 0.81 (0.37, 1.79)                       | 1.45 (0.69, 3.06)                                   | 1.44 (0.73, 2.84)              | 1.75 (0.83, 3.69)                         |
|                        | 3             | 0.65 (0.38, 1.13)                               | 0.88 (0.49, 1.57)                | 1.33 (0.79, 2.22)                       | 0.47 (0.21, 1.09)                       | 1.43 (0.65, 3.16)                                   | 0.84 (0.42, 1.67)              | 0.60 (0.29, 1.23)                         |
|                        | 4             | 1.02 (0.59, 1.76)                               | 1.80 (1.02, 3.17)                | 1.89 (1.10, 3.26)                       | 1.91 (0.75, 4.82)                       | 2.50 (1.16, 5.41)                                   | 2.89 (1.45, 5.76)              | 2.58 (1.20, 5.54)                         |
| Unweighted             | 1             | 1.00 (reference)                                | 1.00 (reference)                 | 1.00 (reference)                        | 1.00 (reference)                        | 1.00 (reference)                                    | 1.00 (reference)               | 1.00 (reference)                          |
|                        | 2             | 1.22 (0.94, 1.58)                               | 1.15 (0.85, 1.57)                | 1.21 (0.92, 1.59)                       | 1.19 (0.78, 1.80)                       | 1.02 (0.72, 1.45)                                   | 1.01 (0.70, 1.46)              | 1.17 (0.83, 1.65)                         |
|                        | 3             | 1.03 (0.80, 1.34)                               | 0.85 (0.63, 1.17)                | 1.06 (0.81, 1.38)                       | 0.95 (0.63, 1.44)                       | 0.79 (0.55, 1.13)                                   | 0.86 (0.60, 1.24)              | 0.83 (0.58, 1.18)                         |
|                        | 4             | 1.30 (0.998, 1.70)                              | 1.46 (1.07, 2.00)                | 1.32 (1.01, 1.74)                       | 1.28 (0.84, 1.95)                       | 1.38 (0.99, 1.95)                                   | 1.64 (1.15, 2.34)              | 1.73 (1.23, 2.44)                         |

Abbreviations: UNGD, unconventional natural gas development; CRS, chronic rhinosinusitis.

Each model compared individuals with symptoms to a reference group with no current or past CRS, no migraine headache symptoms, and lower levels of fatigue. Models included these covariates: sex, race/ethnicity (white non-Hispanic vs. other), centered age (years), square of centered age, Medical Assistance (never vs. ever), and smoking status (never vs. current and former). UNGD activity was averaged over the 90 days prior to the survey.

<sup>a</sup> These models also included centered body mass index. Because individuals with unknown body mass index were excluded, these case counts are slightly lower than those reported in the main text.

**Table S4.** Sensitivity analysis of different time averaging periods for UNGD activity.

| Outcome(s)                                   | UNGD quartile | 7-day averaged UNGD metric                      | 365-day averaged UNGD metric |
|----------------------------------------------|---------------|-------------------------------------------------|------------------------------|
|                                              |               | Adjusted odds ratios (95% confidence intervals) |                              |
| CRS symptoms only<br>(n = 736) <sup>a</sup>  | 1             | 1.00 (reference)                                | 1.00 (reference)             |
|                                              | 2             | 1.23 (0.84, 1.81)                               | 1.38 (0.94, 2.03)            |
|                                              | 3             | 0.76 (0.52, 1.13)                               | 0.80 (0.54, 1.18)            |
|                                              | 4             | 1.12 (0.75, 1.67)                               | 1.16 (0.78, 1.71)            |
| Migraine headache only<br>(n = 580)          | 1             | 1.00 (reference)                                | 1.00 (reference)             |
|                                              | 2             | 1.03 (0.67, 1.58)                               | 1.42 (0.93, 2.18)            |
|                                              | 3             | 0.83 (0.54, 1.28)                               | 1.09 (0.71, 1.65)            |
|                                              | 4             | 1.44 (0.93, 2.23)                               | 1.50 (0.98, 2.29)            |
| Higher levels of fatigue only<br>(n = 666)   | 1             | 1.00 (reference)                                | 1.00 (reference)             |
|                                              | 2             | 1.43 (0.97, 2.09)                               | 1.75 (1.19, 2.56)            |
|                                              | 3             | 1.31 (0.90, 1.89)                               | 1.46 (0.998, 2.13)           |
|                                              | 4             | 1.40 (0.95, 2.08)                               | 1.55 (1.04, 2.30)            |
| CRS and migraine<br>(n = 266) <sup>a</sup>   | 1             | 1.00 (reference)                                | 1.00 (reference)             |
|                                              | 2             | 0.66 (0.35, 1.25)                               | 1.05 (0.57, 1.96)            |
|                                              | 3             | 0.73 (0.38, 1.41)                               | 0.76 (0.38, 1.55)            |
|                                              | 4             | 1.31 (0.69, 2.49)                               | 1.64 (0.86, 3.09)            |
| CRS and fatigue<br>(n = 347) <sup>a</sup>    | 1             | 1.00 (reference)                                | 1.00 (reference)             |
|                                              | 2             | 1.25 (0.73, 2.16)                               | 0.86 (0.50, 1.50)            |
|                                              | 3             | 1.24 (0.71, 2.16)                               | 1.46 (0.86, 2.47)            |
|                                              | 4             | 1.72 (0.97, 3.04)                               | 1.41 (0.81, 2.47)            |
| Migraine and fatigue<br>(n = 420)            | 1             | 1.00 (reference)                                | 1.00 (reference)             |
|                                              | 2             | 1.29 (0.78, 2.15)                               | 1.56 (0.94, 2.60)            |
|                                              | 3             | 0.92 (0.55, 1.54)                               | 1.16 (0.70, 1.91)            |
|                                              | 4             | 2.05 (1.22, 3.43)                               | 1.94 (1.17, 3.22)            |
| All three outcomes<br>(n = 496) <sup>a</sup> | 1             | 1.00 (reference)                                | 1.00 (reference)             |
|                                              | 2             | 1.26 (0.74, 2.14)                               | 1.06 (0.63, 1.77)            |
|                                              | 3             | 0.85 (0.49, 1.49)                               | 0.80 (0.47, 1.36)            |
|                                              | 4             | 2.02 (1.19, 3.43)                               | 1.79 (1.06, 3.03)            |

Abbreviations: UNGD, unconventional natural gas development; CRS, chronic rhinosinusitis.

In all models, the reference group consisted of individuals with no current or past CRS, no migraine headache symptoms, and lower levels of fatigue. All models used sampling weights to account for the stratified survey design and response rates. The highest sampling weight was truncated to the value of the second-highest weight. All models included these covariates: sex, race/ethnicity (white non-Hispanic vs. other), centered age (years), square of centered age, Medical Assistance (never vs. ever), smoking status (never vs. current and former).

<sup>a</sup> These models included centered body mass index. Because individuals with missing body mass index were excluded, these case counts are slightly lower than those reported in the main text.

**Table S5.** Associations of UNGD with past CRS and moderate levels of fatigue.

| UNGD quartile | Model 1: Past CRS                               | Model 2: Moderate fatigue |
|---------------|-------------------------------------------------|---------------------------|
|               | Adjusted odds ratios (95% confidence intervals) |                           |
| 1             | 1.00 (reference)                                | 1.00 (reference)          |
| 2             | 1.39 (1.01, 1.91)                               | 0.99 (0.73, 1.35)         |
| 3             | 1.10 (0.80, 1.50)                               | 0.90 (0.67, 1.22)         |
| 4             | 1.27 (0.91, 1.77)                               | 1.03 (0.75, 1.42)         |

Abbreviations: UNGD, unconventional natural gas development; CRS, chronic rhinosinusitis.

The reference group for both models consisted of individuals with no current or past CRS, no migraine headache symptoms, and lower levels of fatigue. Models used sampling weights to account for the stratified survey design and response rates. The highest sampling weight was truncated to the value of the second-highest weight. Both models included these covariates: sex, race/ethnicity (white non-Hispanic vs. other), centered age (years), square of centered age, Medical Assistance (never vs. ever), smoking status (never vs. current and former). In addition, the past CRS model included centered body mass index.

**Table S6.** Selected characteristics of individuals in the fourth quartile of UNGD, compared to those in other quartiles.

| <b>Characteristic</b>                          | <b>Fourth quartile of UNGD</b> | <b>All others</b> | <b><i>p</i>-value</b> |
|------------------------------------------------|--------------------------------|-------------------|-----------------------|
| Total number                                   | 1947                           | 5838              | NA                    |
| Sex, n (%)                                     |                                |                   |                       |
| Male                                           | 722 (37.1)                     | 2187 (37.5)       | 0.79                  |
| Female                                         | 1225 (62.9)                    | 3651 (62.5)       |                       |
| Race/ethnicity, n (%)                          |                                |                   |                       |
| White non-Hispanic                             | 1735 (89.1)                    | 5308 (90.9)       | 0.02                  |
| Other                                          | 212 (10.9)                     | 530 (9.1)         |                       |
| Age in years, mean (sd)                        | 54.8 (16.7)                    | 55.4 (15.9)       | 0.16                  |
| Smoking status, n (%)                          |                                |                   |                       |
| Never                                          | 918 (47.1)                     | 3350 (57.4)       | < 0.001               |
| Current                                        | 351 (18.0)                     | 779 (13.3)        |                       |
| Former                                         | 678 (34.8)                     | 1709 (29.3)       |                       |
| History of receiving Medical Assistance, n (%) |                                |                   |                       |
| Never                                          | 1669 (85.7)                    | 5207 (89.2)       | 0.79                  |
| Ever                                           | 278 (14.3)                     | 631 (10.8)        |                       |
| Place type, n (%)                              |                                |                   |                       |
| Township                                       | 831 (42.7)                     | 4118 (70.5)       | < 0.001               |
| Borough                                        | 667 (34.3)                     | 1468 (25.1)       |                       |
| Census tract in city                           | 449 (23.1)                     | 252 (4.3)         |                       |
| Community socioeconomic deprivation, mean (sd) | 0.6 (3.6)                      | -0.2 (3.6)        | < 0.001               |
| Education level, n (%)                         |                                |                   |                       |
| Less than high school                          | 712 (36.6)                     | 2210 (37.9)       | 0.90                  |
| High school graduate                           | 81 (4.2)                       | 236 (4.0)         |                       |
| Some college                                   | 518 (26.6)                     | 1528 (26.2)       |                       |
| Bachelor's degree or higher                    | 608 (31.2)                     | 1784 (30.6)       |                       |
| Missing                                        | 28 (1.4)                       | 80 (1.4)          |                       |

Abbreviations: UNGD, unconventional natural gas development; NA, not applicable; sd, standard deviation. UNGD activity was averaged over the 90 days prior to the survey.



**Table S7.** Effect of place type (township, borough, or census tract in city) on associations of UNGD with symptoms.

| Outcome(s)                                    | UNGD quartile | Model 1:<br>Base model                             | Model 2:<br>Base model plus<br>place type |
|-----------------------------------------------|---------------|----------------------------------------------------|-------------------------------------------|
|                                               |               | Adjusted odds ratios<br>(95% confidence intervals) |                                           |
| CRS symptoms only<br>(n = 736)                | 1             | 1.00 (reference)                                   | 1.00 (reference)                          |
|                                               | 2             | 1.17 (0.80, 1.72)                                  | 1.15 (0.78, 1.70)                         |
|                                               | 3             | 0.76 (0.52, 1.12)                                  | 0.75 (0.51, 1.11)                         |
|                                               | 4             | 1.11 (0.75, 1.65)                                  | 0.99 (0.65, 1.51)                         |
| Migraine headache<br>only (n = 580)           | 1             | 1.00 (reference)                                   | 1.00 (reference)                          |
|                                               | 2             | 1.14 (0.74, 1.75)                                  | 1.12 (0.73, 1.73)                         |
|                                               | 3             | 0.89 (0.58, 1.36)                                  | 0.89 (0.59, 1.36)                         |
|                                               | 4             | 1.43 (0.94, 2.18)                                  | 1.22 (0.78, 1.91)                         |
| Higher levels of<br>fatigue only<br>(n = 666) | 1             | 1.00 (reference)                                   | 1.00 (reference)                          |
|                                               | 2             | 1.48 (1.01, 2.17)                                  | 1.48 (1.006, 2.16)                        |
|                                               | 3             | 1.22 (0.84, 1.77)                                  | 1.21 (0.83, 1.77)                         |
|                                               | 4             | 1.47 (0.996, 2.18)                                 | 1.34 (0.89, 2.02)                         |
| CRS and migraine<br>(n = 266)                 | 1             | 1.00 (reference)                                   | 1.00 (reference)                          |
|                                               | 2             | 0.82 (0.43, 1.57)                                  | 0.82 (0.43, 1.56)                         |
|                                               | 3             | 0.74 (0.38, 1.47)                                  | 0.76 (0.39, 1.51)                         |
|                                               | 4             | 1.49 (0.78, 2.85)                                  | 1.50 (0.75, 3.01)                         |
| CRS and fatigue<br>(n = 347)                  | 1             | 1.00 (reference)                                   | 1.00 (reference)                          |
|                                               | 2             | 1.06 (0.62, 1.80)                                  | 1.04 (0.61, 1.79)                         |
|                                               | 3             | 0.94 (0.53, 1.66)                                  | 0.94 (0.54, 1.67)                         |
|                                               | 4             | 1.88 (1.08, 3.25)                                  | 1.77 (0.99, 3.19)                         |
| Migraine and fatigue<br>(n = 420)             | 1             | 1.00 (reference)                                   | 1.00 (reference)                          |
|                                               | 2             | 1.06 (0.63, 1.78)                                  | 1.05 (0.63, 1.76)                         |
|                                               | 3             | 0.80 (0.49, 1.31)                                  | 0.80 (0.49, 1.31)                         |
|                                               | 4             | 1.95 (1.18, 3.21)                                  | 1.79 (1.06, 3.03)                         |
| All three outcomes<br>(n = 496)               | 1             | 1.00 (reference)                                   | 1.00 (reference)                          |
|                                               | 2             | 1.05 (0.63, 1.78)                                  | 1.05 (0.62, 1.78)                         |
|                                               | 3             | 0.73 (0.42, 1.27)                                  | 0.76 (0.44, 1.31)                         |
|                                               | 4             | 1.84 (1.08, 3.14)                                  | 1.81 (1.04, 3.15)                         |

Abbreviations: UNGD, unconventional natural gas development; CRS, chronic rhinosinusitis. Covariates in the base model were sex, race/ethnicity, centered age (linear and quadratic terms), smoking status, Medical Assistance. CRS models also included centered body mass index. The reference group for all models consisted of individuals with no current or past CRS, no migraine headache symptoms, and lower levels of fatigue. All models used sampling weights, and the highest weight was reduced to the value of the second-highest weight.

The baseline questionnaire, “Population Study of Nasal and Sinus Symptoms,” is a separate PDF file in the Supplemental Code and Data ZIP File.
